# Supplementary material
Source: Royal Society of Chemistry journal article supplement (doi:10.1039/d5el00192g)
Supplement: d5el00192g1.pdf [file d5el00192g1.pdf]

## Supplementary Information

# Bias-Free, High-Rate Solar Hydrogen Production in Alkaline Media with a NiCo-Coupled Perovskite Photocathode

*Minseo Lee<sup>‡</sup>, Wooyeon Kim<sup>‡</sup>, Hayoung Kim<sup>‡</sup>, Seoyeong Lee, Min Jae Ko\*, and Youn Jeong Jang\**

Department of Chemical Engineering, Hanyang University, 222, Wangsimni-ro, Seongdong-gu, Seoul, 04763, Republic of Korea

\*Correspondence: [mjko@hanyang.ac.kr](mailto:mjko@hanyang.ac.kr) (M. J. K.) and [yjang53@hanyang.ac.kr](mailto:yjang53@hanyang.ac.kr) (Y. J. J)

<sup>‡</sup>These authors contributed equally: Minseo Lee, Wooyeon Kim, Hayoung Kim

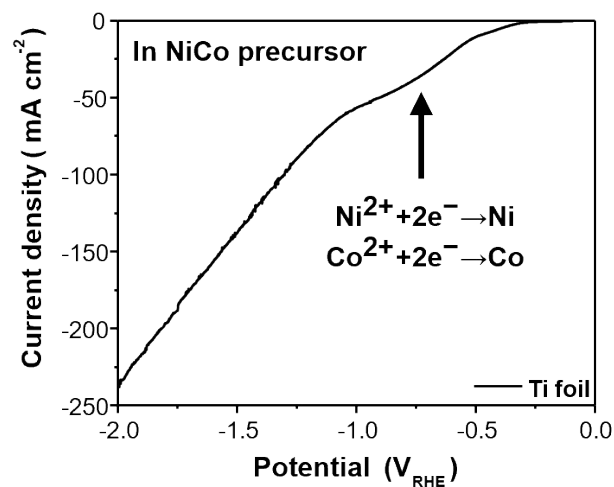

**Fig. S1** Linear sweep voltammetry (LSV) curve of Ti foil in NiCo precursor.

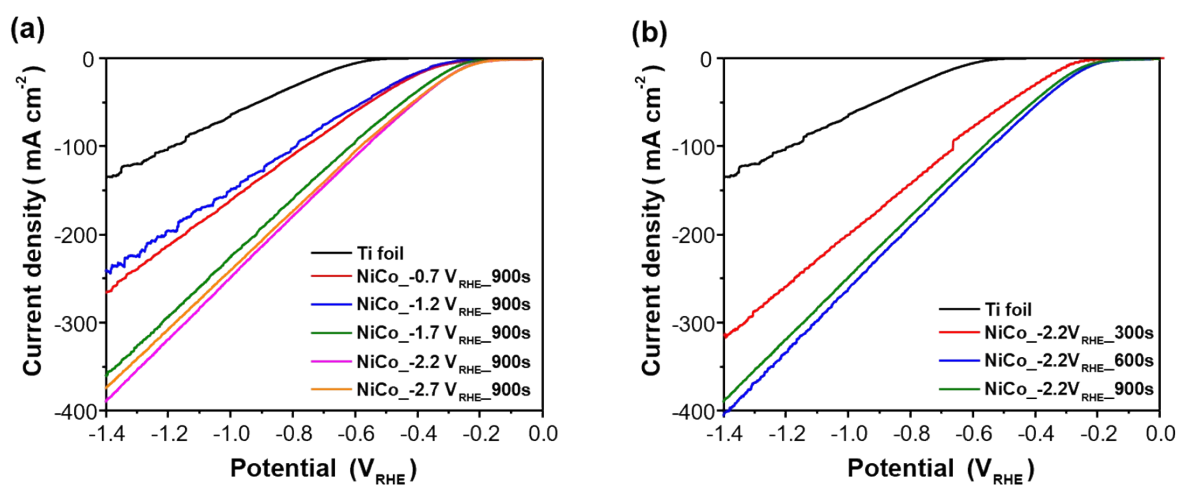

**Fig. S2** LSV curves in 1M KOH depending on the deposition (a) potential and (b) time of NiCo catalyst for hydrogen evolution reaction (HER).

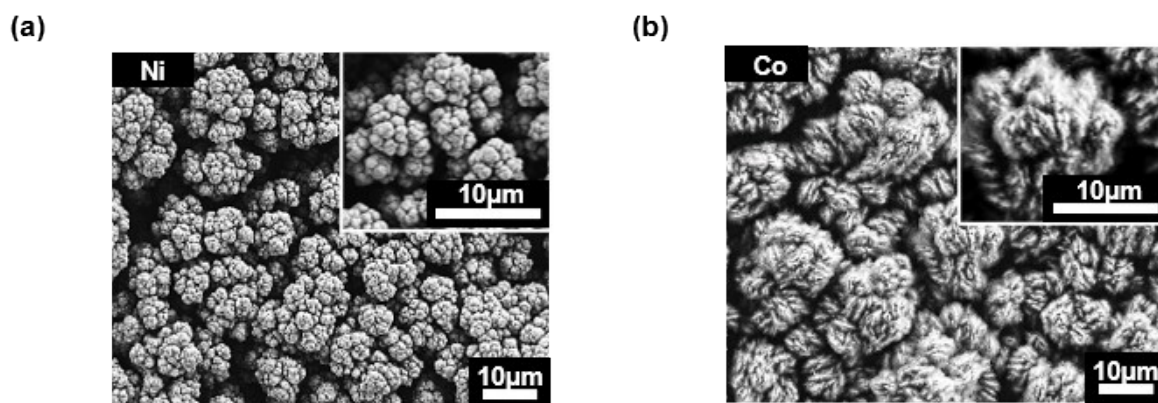

**Fig. S3** Field-emission scanning electron microscopy (FE-SEM) images of (a) Ni and (b) Co. The inserts show higher-magnification images.

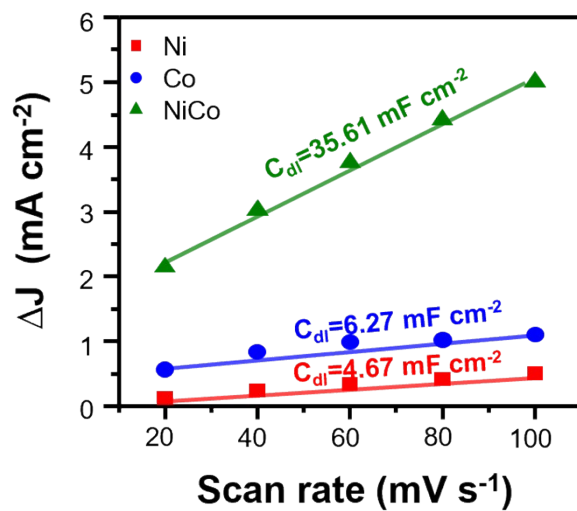

**Fig. S4** Evaluation of electric double layer capacitance ( $C_{dl}$ ) for Ni, Co and NiCo catalysts estimated from CV curves at scan rates of 20, 40, 60, 80, 100 mV s<sup>-1</sup>.

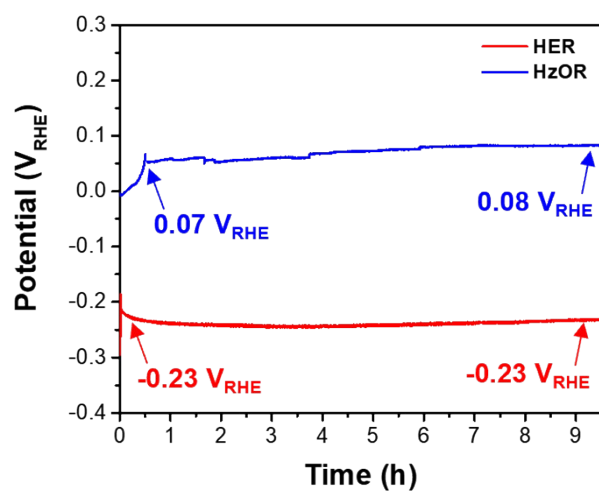

**Fig. S5** Chronopotentiometry at  $10 \text{ mA cm}^{-2}$  of NiCo in 1 M KOH (red) and 1 M KOH + 0.5 M hydrazine (blue).

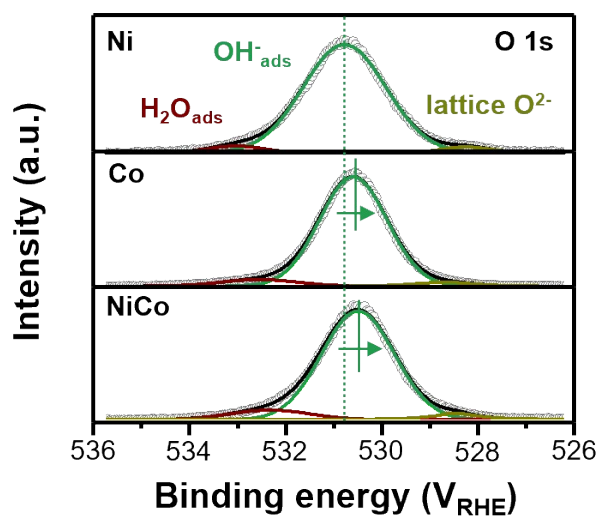

**Fig. S6** X-ray photoelectron spectroscopy (XPS) spectra for O 1s of Ni, Co, and NiCo.

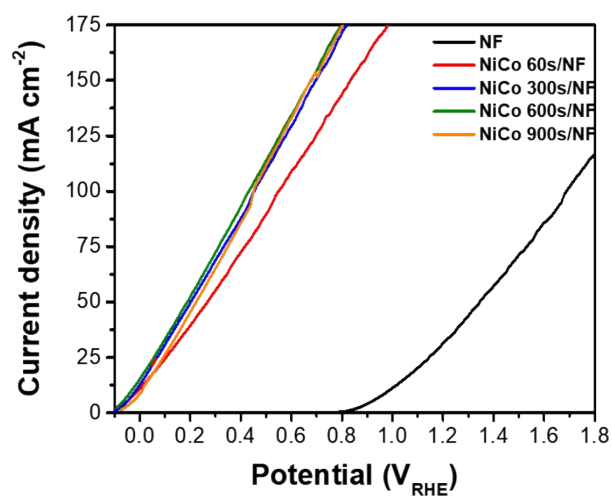

**Fig. S7** LSV curves of Ni foam in 1 M KOH + 0.5 M hydrazine depending on the deposition time of NiCo catalyst for HzOR.

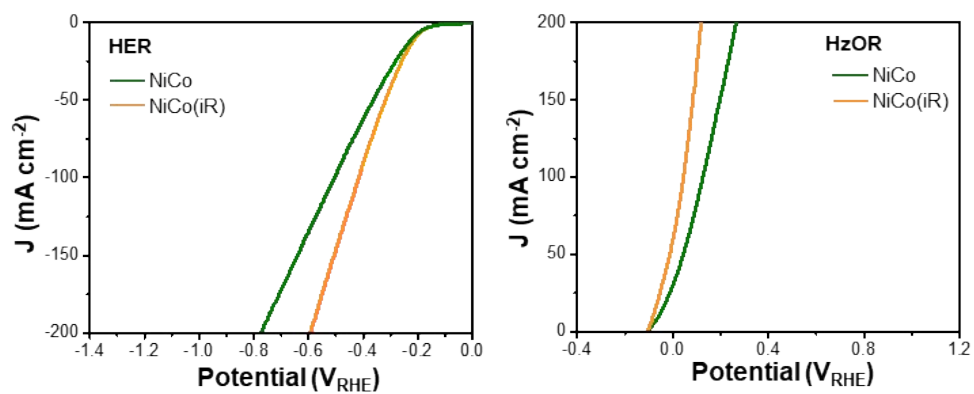

**Fig. S8** LSV curves of the NiCo catalyst for HER and HzOR before and after iR correction.

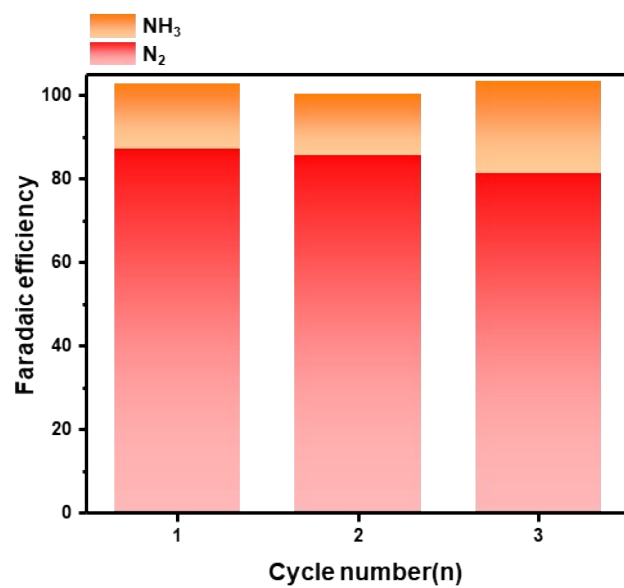

**Fig. S9** Faradaic efficiency of NiCo/NF for HzOR over cycling

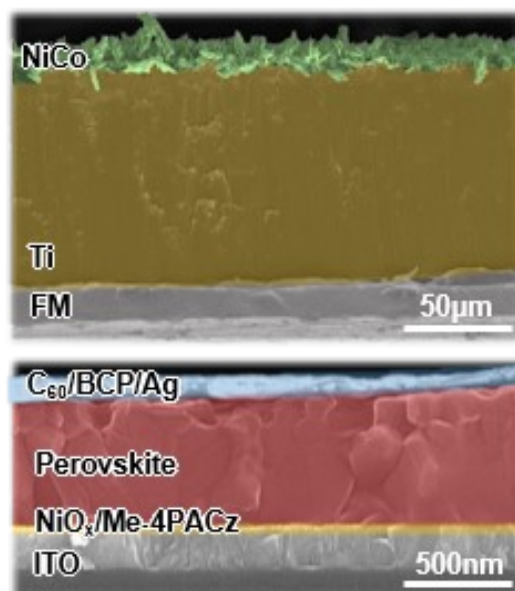

**Fig. S10** Cross-sectional SEM image of the perovskite/NiCo photocathode.

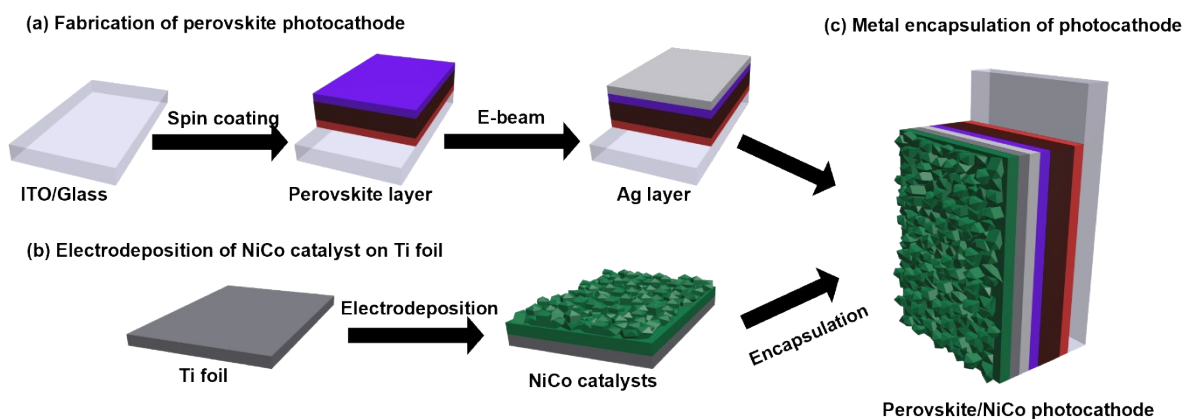

**Fig. S11** Schematic illustration of the fabrication process for the perovskite photocathode and NiCo catalyst.

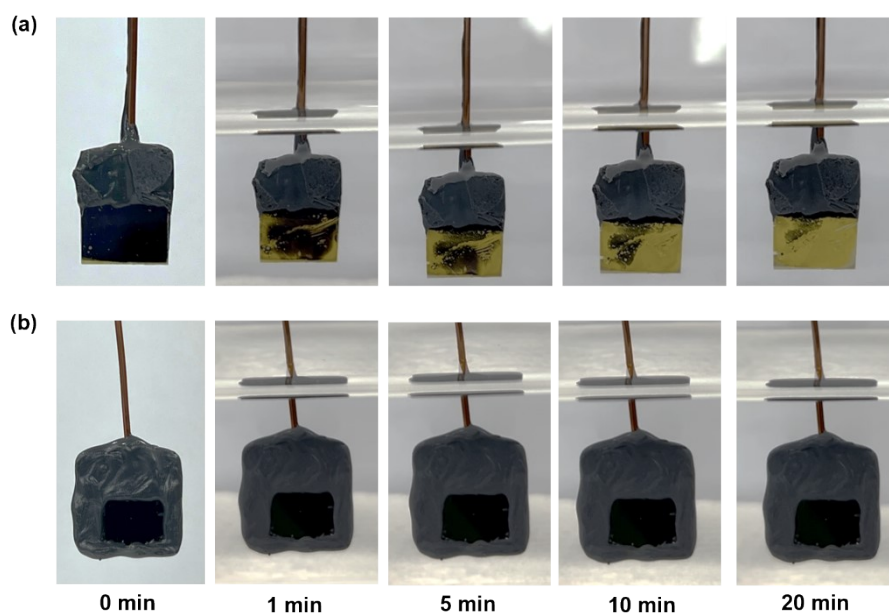

**Fig. S12** Optical images of perovskite photocathode (a) without and (b) with encapsulation.

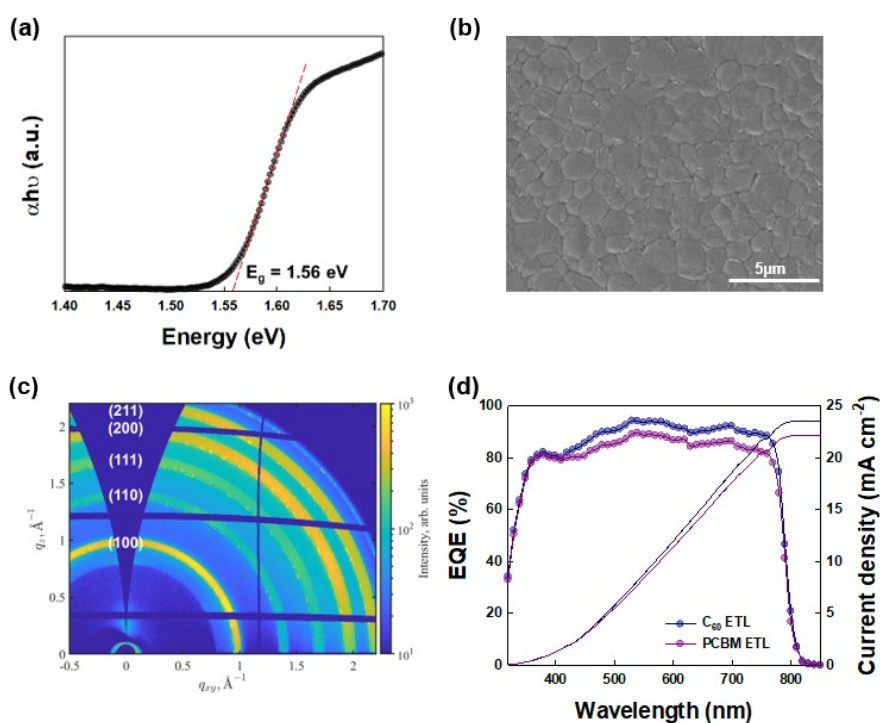

**Fig. S13** (a) Tauc plots showing the optical bandgaps. (b) Top-view SEM image and (c) grazing incidence wide-angle X-ray scattering (GIWAXS) patterns of the perovskite film (d) External quantum efficiency (EQE) spectra of perovskite solar cells with different ETLs and integrated  $J_{SC}$  calculated from EQE.

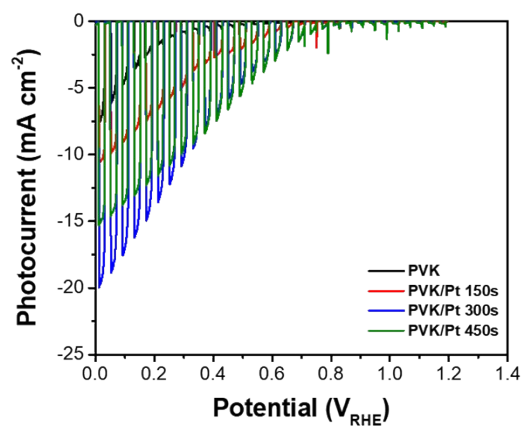

**Fig. S14** LSV curves of lead halide perovskite (PVK) photocathode depending on the deposition time of Pt.

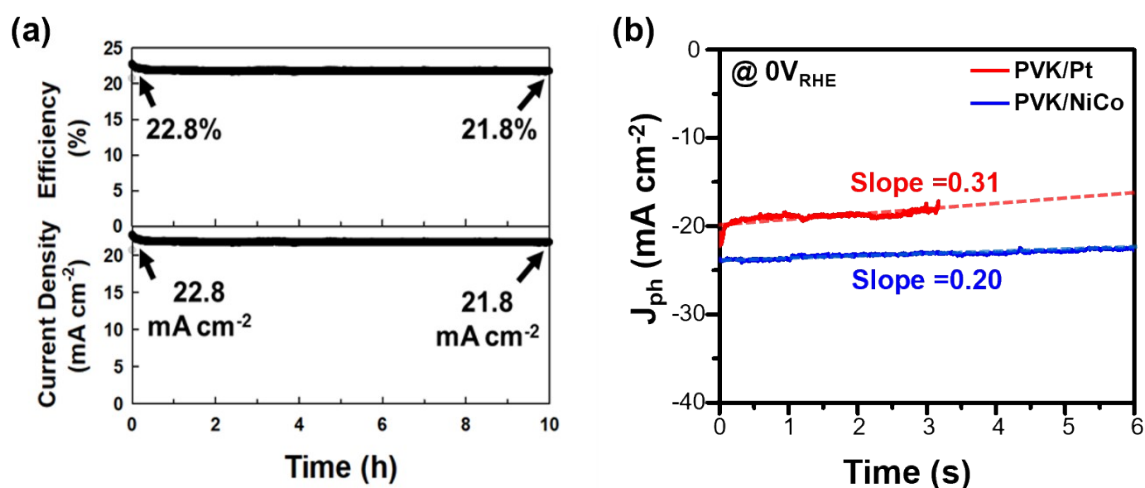

**Fig. S15** (a) Operational stability test of perovskite solar cells under maximum power point tracking (MPPT) conditions under ambient conditions. (b)  $J$ - $t$  curve at  $0 V_{\text{RHE}}$  of PVK/Pt and PVK/NiCo photocathode for 6 h.

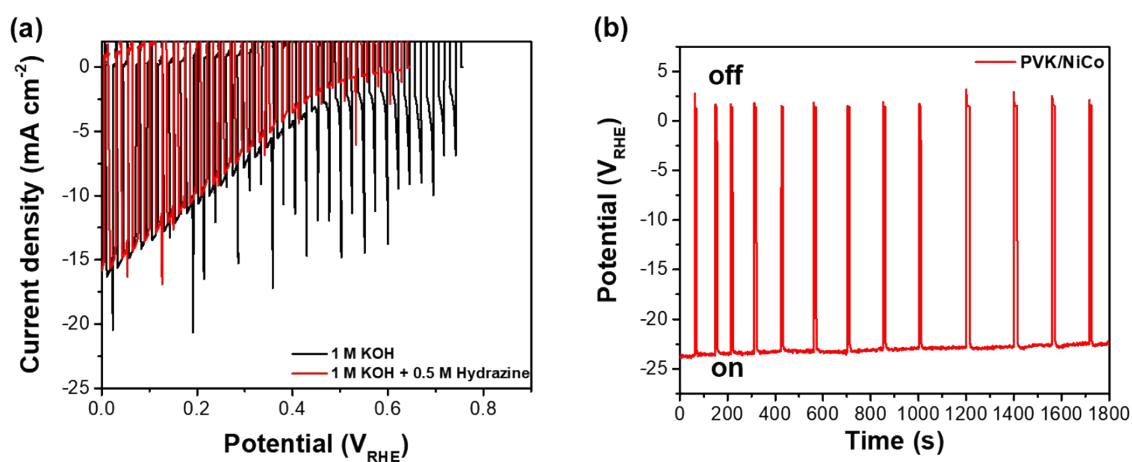

**Fig. S16** (a) LSV curves depending on hydrazine and (b) chronoamperometry of PVK/NiCo photocathode in 1 M KOH + 0.5 M hydrazine.

**Table S1** The composition of electrodeposited NiCo catalyst measured by inductively coupled plasma mass spectrometry (ICP-MS).

| <b>Method</b>       | <b>Ni</b>             | <b>Co</b>             | <b>Ni/Co ratio</b> |
|---------------------|-----------------------|-----------------------|--------------------|
| ICP-MS (total, mol) | $1.28 \times 10^{-4}$ | $1.41 \times 10^{-4}$ | 0.91               |

**Table S2** EIS fitting parameters for Ni, Co, and NiCo.

| <b>Catalyst</b> | <b>R<sub>s</sub><br/>(<math>\Omega</math>)</b> | <b>R<sub>ct</sub><br/>(<math>\Omega</math>)</b> |
|-----------------|------------------------------------------------|-------------------------------------------------|
| Ni              | $3.22 \pm 0.29$                                | $2.29 \pm 0.18$                                 |
| Co              | $3.88 \pm 0.30$                                | $2.23 \pm 0.15$                                 |
| NiCo            | $3.53 \pm 0.18$                                | $1.59 \pm 0.11$                                 |

**Table S3** Faradaic efficiency distribution(%) of N<sub>2</sub> and NH<sub>3</sub> during HzOR.

| <b>Cycle number</b> | <b>N<sub>2</sub><br/>(%)</b> | <b>NH<sub>3</sub><br/>(%)</b> |
|---------------------|------------------------------|-------------------------------|
| 1                   | 87.22                        | 15.61                         |
| 2                   | 85.62                        | 14.59                         |
| 3                   | 81.44                        | 22.14                         |

**Table S4** The comparison of the overpotential at 10 mA cm<sup>-2</sup> ( $\eta_{10}$ ) for HzOR and HER.

| <b>Catalyst</b>                     | <b>HER<br/><math>\eta_{10}</math> (mV)</b> | <b>HzOR<br/><math>\eta_{10}</math> (mV)</b> | <b>Reference</b> |
|-------------------------------------|--------------------------------------------|---------------------------------------------|------------------|
| Ni                                  | 218.4                                      | 285.2                                       | This work        |
| Co                                  | 286.8                                      | 274.6                                       | This work        |
| NiCo                                | 191.2                                      | 267.9                                       | This work        |
| NiS <sub>2</sub> /TiM               | 220                                        | 390                                         | 1                |
| CoSe/CFP                            | 204                                        | 321                                         | 2                |
| Pd/NiCo <sub>2</sub> O <sub>4</sub> | 294                                        | 324                                         | 3                |

**Table S5** Photovoltaic parameters of C<sub>60</sub>- and PCBM-based perovskite solar cells

| <b>ETL</b>      | <b>Scan<br/>direction</b> | <b>Voc<br/>(V)</b> | <b>Jsc<br/>(mA cm<sup>-2</sup>)</b> | <b>FF<br/>(%)</b> | <b>PCE<br/>(%)</b> |
|-----------------|---------------------------|--------------------|-------------------------------------|-------------------|--------------------|
| C <sub>60</sub> | Reverse                   | 1.155              | 24.36                               | 81.41             | 22.91              |
|                 | Forward                   | 1.157              | 24.24                               | 81.03             | 22.72              |
| PCBM            | Reverse                   | 1.132              | 23.38                               | 79.77             | 21.12              |
|                 | Forward                   | 1.13               | 23.39                               | 79.61             | 21.05              |

**Table S6** Time-resolved photoluminescence (TRPL) fitting parameters for PVK, PVK/C<sub>60</sub>/BCP, and PVK/PCBM/BCP films. Time constants were calculated from the TRPL spectra. Lifetime decay components were fitted using a bi-exponential decay model (Fit function =  $A_1e^{-t/\tau_1} + A_2e^{-t/\tau_2}$ ).

| <b>Sample</b>            | <b>A<sub>1</sub><br/>(%)</b> | <b>τ<sub>1</sub><br/>(ns)</b> | <b>A<sub>2</sub><br/>(%)</b> | <b>τ<sub>2</sub><br/>(ns)</b> | <b>τ<sub>AVG</sub><br/>(ns)</b> |
|--------------------------|------------------------------|-------------------------------|------------------------------|-------------------------------|---------------------------------|
| PVK                      | 11.83                        | 50.31                         | 88.17                        | 1632.01                       | 1625.49                         |
| PVK/C <sub>60</sub> /BCP | 64.63                        | 49.47                         | 35.37                        | 249.80                        | 196.58                          |
| PVK/PCBM/BCP             | 34.60                        | 63.53                         | 65.40                        | 342.07                        | 317.15                          |

$$\tau_{AVG} = (A_1\tau_1^2 + A_2\tau_2^2)/(A_1\tau_1 + A_2\tau_2)$$

**Table S7** The comparison of the PEC HER performance with the reported perovskite-based photocathode.

| Catalyst       | $J_{\text{ph}} @ 0 \text{ V}_{\text{RHE}}$<br>( $\text{mA cm}^{-2}$ ) | $E_{\text{onset}}$<br>( $\text{V}_{\text{RHE}}$ ) | Electrolyte                   | $\text{H}_2$ production rate<br>( $\mu\text{mol h}^{-1} \text{cm}^{-2}$ )* | Ref.      |
|----------------|-----------------------------------------------------------------------|---------------------------------------------------|-------------------------------|----------------------------------------------------------------------------|-----------|
| NiCo           | -24.00                                                                | 0.99                                              | 1.0 M KOH                     | 447.7                                                                      | This work |
| Pt             | -22.00                                                                | 1.06                                              | 0.5 M $\text{H}_2\text{SO}_4$ | 410.4                                                                      | 4         |
| NiPCoP         | -21.98                                                                | 1.06                                              | 1.0 M KOH                     | 410.1                                                                      | 5         |
| Pt             | -21.70                                                                | 1.10                                              | 0.5 M $\text{H}_2\text{SO}_4$ | 404.8                                                                      | 6         |
| NiMo           | -21.00                                                                | 1.03                                              | 1.0 M KOH                     | 391.8                                                                      | 7         |
| $\text{MoS}_2$ | -20.60                                                                | 1.02                                              | 0.5 M $\text{H}_2\text{SO}_4$ | 384.3                                                                      | 8         |
| Au-Pt-Ni       | -20.13                                                                | 0.95                                              | 0.5 M $\text{H}_2\text{SO}_4$ | 375.5                                                                      | 9         |
| Pt             | -18.10                                                                | 0.95                                              | 0.5 M $\text{H}_2\text{SO}_4$ | 337.7                                                                      | 10        |
| Pt             | -14.30                                                                | 0.95                                              | 0.1 M KPi                     | 266.8                                                                      | 11        |
| Pt             | -12.10                                                                | 0.60                                              | 0.1 M KBi                     | 225.7                                                                      | 12        |
| Pt             | -9.80                                                                 | 0.95                                              | 0.1 M KBi                     | 182.8                                                                      | 13        |
| Pt             | -10.50                                                                | 0.68                                              | 0.5 M $\text{H}_2\text{SO}_4$ | 195.9                                                                      | 14        |
| Pt             | -21.00                                                                | 1.1                                               | 0.1 M $\text{H}_2\text{SO}_4$ | 391.8                                                                      | 15        |
| Pt             | -20.40                                                                | 1.15                                              | 0.5 M $\text{H}_2\text{SO}_4$ | 380.6                                                                      | 16        |

\*IF faradaic efficiency=100%,  $\text{H}_2$  production rate =  $J_{\text{ph}} * 10^3 * 3600 / (2 * 96485)$

**Table S8** The comparison of the bias-free HER performance with reported PEC cell.

| Photocathode                       | Photoanode                           | PV                       | STH   | $J_{op}^*$<br>(mA cm <sup>-2</sup> ) | Ref.      |
|------------------------------------|--------------------------------------|--------------------------|-------|--------------------------------------|-----------|
| PVK                                | -                                    | -                        | 7.62  | 24.00                                | This work |
| CIGS                               | BiVO <sub>4</sub>                    | -                        | 1.01  | 1.05                                 | 17        |
| Cu <sub>2</sub> O                  | BiVO <sub>4</sub>                    | -                        | 3.00  | 2.45                                 | 18        |
| CIGS                               | BiVO <sub>4</sub>                    | -                        | 3.70  | 3.00                                 | 19        |
| Sb <sub>2</sub> Se <sub>3</sub>    | BiVO <sub>4</sub>                    | -                        | 1.50  | 1.20                                 | 20        |
| Si                                 | BiVO <sub>4</sub>                    | -                        | 3.50  | 2.85                                 | 21        |
| Cu <sub>2</sub> O                  | BiVO <sub>4</sub>                    | -                        | 3.24  | 2.95                                 | 22        |
| SnS                                | BiVO <sub>4</sub>                    | -                        | 1.70  | 1.40                                 | 23        |
| Cu <sub>3</sub> BiS <sub>3</sub>   | BiVO <sub>4</sub>                    | -                        | 2.04  | 1.66                                 | 24        |
| Si                                 | BiVO <sub>4</sub>                    | -                        | 3.70  | 3.03                                 | 25        |
| Cu <sub>2</sub> ZnSnS <sub>4</sub> | BiVO <sub>4</sub>                    | -                        | 3.17  | 2.58                                 | 26        |
| Si                                 | Sb <sub>2</sub> S <sub>3</sub>       | -                        | 5.24  | 4.30                                 | 27        |
| Cu <sub>3</sub> BiS <sub>3</sub>   | BiVO <sub>4</sub>                    | -                        | 2.33  | 1.89                                 | 28        |
| Si                                 | In <sub>2</sub> S <sub>3</sub> /CdTe | -                        | 5.10  | 4.15                                 | 29        |
| CIGS                               | -                                    | PVK                      | 9.04  | 7.75                                 | 30        |
| Sb <sub>2</sub> Se <sub>3</sub>    | -                                    | Dual PVK                 | 10.2  | 8.30                                 | 31        |
| -                                  | Ta <sub>3</sub> N <sub>5</sub>       | Dual CuInSe <sub>2</sub> | 11.07 | 9.50                                 | 32        |
| -                                  | Ta <sub>3</sub> N <sub>5</sub>       | Dual CIS                 | 8.20  | 6.70                                 | 33        |
| -                                  | BiVO <sub>4</sub>                    | PVK/Si                   | 9.02  | 7.33                                 | 34        |

\*Current density of the operating point for PEC cell without external bias.

## Reference

1. J. Wang, X. Ma, T. Liu, D. Liu, S. Hao, G. Du, R. Kong, A. M. Asiri, and X. Sun, *Materials Today Energy*, 2017, **3**, 9–14.
2. Z. Pu, I. S. Amiinu, F. Gao, Z. Xu, C. Zhang, W. Li, G. Li, and S. Mu, *Journal of Power Sources*, 2018, **401**, 238–244.
3. R. A. Senthil, S. Jung, A. Min, A. Kumar, C. J. Moon, M. Singh, and M. Y. Choi, *ACS Catalysis*, 2024, **14**, 3320–3335.
4. A. M. Fehr, A. Agrawal, F. Mandani, C. L. Conrad, Q. Jiang, S. Y. Park, O. Alley, B. Li, S. Sidhik, and I. Metcalf, *Nature Communications*, 2023, **14**, 3797.
5. R. Rhee, T. G. Kim, G. Y. Jang, G. Bae, J. H. Lee, S. Lee, S. Kim, S. Jeon, and J. H. Park, *Carbon Energy*, 2023, **5**, e232.
6. J. H. Kim, S. Seo, J. H. Lee, H. Choi, S. Kim, G. Piao, Y. R. Kim, B. Park, J. Lee, and Y. Jung, *Advanced Functional Materials*, 2021, **31**, 2008277.
7. H. Choi, S. Seo, C. J. Yoon, J. B. Ahn, C. S. Kim, Y. Jung, Y. Kim, F. M. Toma, H. Kim, and S. Lee, *Advanced Science*, 2023, **10**, 2303106.
8. H. Choi, S. Seo, J.-H. Kim, J.-H. Lee, S. Kim, G. Piao, H. Park, K. Lee, and S. Lee, 2021.
9. S. Khamgaonkar, Q. Chen, K. Musselman, and V. Maheshwari, *Journal of Materials Chemistry A*, 2023, **11**, 20079–20088.
10. H. Zhang, Z. Yang, W. Yu, H. Wang, W. Ma, X. Zong, and C. Li, *Advanced Energy Materials*, 2018, **8**, 1800795.
11. S. Ahmad, A. Sadhanala, R. L. Hoyer, V. Andrei, M. H. Modarres, B. Zhao, J. Ronge, R. Friend, and M. De Volder, *ACS Applied Materials & Interfaces*, 2019, **11**, 23198–23206.
12. V. Andrei, R. L. Hoyer, M. Crespo-Quesada, M. Bajada, S. Ahmad, M. De Volder, R. Friend, and E. Reisner, *Advanced Energy Materials*, 2018, **8**, 1801403.
13. M. Crespo-Quesada, L. M. Pazos-Outón, J. Warnan, M. F. Kuehnel, R. H. Friend, and E. Reisner, *Nature Communications*, 2016, **7**, 12555.
14. I. S. Kim, M. J. Pellin, and A. B. Martinson, *ACS Energy Letters*, 2019, **4**, 293–298.
15. J. Park, J. Lee, H. Lee, H. Im, S. Moon, C. S. Jeong, W. Yang, and J. Moon, *Small*, 2023, **19**, 2300174.
16. Y. Choi, R. Mehrotra, S.-H. Lee, T. V. T. Nguyen, I. Lee, J. Kim, H.-Y. Yang, H. Oh, H. Kim, and J.-W. Lee, *Nature Communications*, 2022, **13**, 5709.
17. M. Chen, Y. Liu, C. Li, A. Li, X. Chang, W. Liu, Y. Sun, T. Wang, and J. Gong, *Energy & Environmental Science*, 2018, **11**, 2025–2034.
18. L. Pan, J. H. Kim, M. T. Mayer, M.-K. Son, A. Ummadisingu, J. S. Lee, A. Hagfeldt, J. Luo, and M. Grätzel, *Nature Catalysis*, 2018, **1**, 412–420.
19. H. Kobayashi, N. Sato, M. Orita, Y. Kuang, H. Kaneko, T. Minegishi, T. Yamada, and K. Domen, *Energy & Environmental Science*, 2018, **11**, 3003–3009.
20. W. Yang, J. H. Kim, O. S. Hutter, L. J. Phillips, J. Tan, J. Park, H. Lee, J. D. Major, J. S. Lee, and J. Moon, *Nature Communications*, 2020, **11**, 861.
21. S. Feng, T. Wang, B. Liu, C. Hu, L. Li, Z.-J. Zhao, and J. Gong, *Angewandte Chemie International Edition*, 2020, **59**, 2044–2048.
22. Y. Zhang, H. Lv, Z. Zhang, L. Wang, X. Wu, and H. Xu, *Advanced Materials*, 2021, **33**, 2008264.

23. H. Lee, J. W. Yang, J. Tan, J. Park, S. G. Shim, Y. S. Park, J. Yun, K. Kim, H. W. Jang, and J. Moon, *Advanced Science*, 2021, **8**, 2102458.
24. D. Huang, L. Li, K. Wang, Y. Li, K. Feng, and F. Jiang, *Nature Communications*, 2021, **12**, 3795.
25. B. Liu, S. Wang, S. Feng, H. Li, L. Yang, T. Wang, and J. Gong, *Advanced Functional Materials*, 2021, **31**, 2007222.
26. D. Huang, K. Wang, L. Li, K. Feng, N. An, S. Ikeda, Y. Kuang, Y. Ng, and F. Jiang, *Energy & Environmental Science*, 2021, **14**, 1480–1489.
27. L. Wang, W. Lian, B. Liu, H. Lv, Y. Zhang, X. Wu, T. Wang, J. Gong, T. Chen, and H. Xu, *Advanced Materials*, 2022, **34**, 2200723.
28. S. Moon, J. Park, H. Lee, J. W. Yang, J. Yun, Y. S. Park, J. Lee, H. Im, H. W. Jang, W. Yang, and J. Moon, *Advanced Science*, 2023, **10**, 2206286.
29. Y. Cai, S. Wang, B. Liu, G. Zhang, H. Gao, Y. Tong, Q. Chang, P. Zhang, T. Wang, and J. Gong, *Nature Communications*, 2025, **16**, 5105.
30. B. Koo, D. Kim, P. Boonmongkolras, S. R. Pae, S. Byun, J. Kim, J. H. Lee, D. H. Kim, S. Kim, and B. T. Ahn, *ACS Applied Energy Materials*, 2020, **3**, 2296–2303.
31. W. Yang, J. Park, H.-C. Kwon, O. S. Hutter, L. J. Phillips, J. Tan, H. Lee, J. Lee, S. D. Tilley, and J. D. Major, *Energy & Environmental Science*, 2020, **13**, 4362–4370.
32. Y. Pihosh, V. Nandal, T. Higashi, R. Shoji, R. Bekarevich, H. Nishiyama, T. Yamada, V. Nicolosi, T. Hisatomi, and H. Matsuzaki, *Advanced Energy Materials*, 2023, **13**, 2301327.
33. Y. Kawase, T. Higashi, K. Obata, F. Kishimoto, Y. Pihosh, K. Domen, and K. Takanaabe, *Chemistry of Materials*, 2024, **36**, 2390–2401.
34. J. W. Yang, S. G. Ji, C.-S. Jeong, J. Kim, H. R. Kwon, T. H. Lee, S. A. Lee, W. S. Cheon, S. Lee, H. Lee, M. S. Kwon, J. Moon, J. Y. Kim, and H. W. Jang, *Energy & Environmental Science*, 2024, **17**, 2541–2553.
